# Supplementary material
Source: publisher site journal article supplement (https://www.dovepress.com/get_supplementary_file.php?f=441000.xlsx)
Supplement: Supplementary file 1 [file get_supplementary_file.php]

## Sheet: Sheet1
Sample ID	Sample Type	DNA Concentration
LC-P20230315042	ulcer	20.4488
LC-P20230315042	ulcer	2.90276
LC-P20230315042	ulcer	0.717597
LC-P20230315042	ulcer	29.5617
LC-P20230315042	ulcer	21.7113
LC-P20230315042	ulcer	0.755365
LC-P20230315042	ulcer	1.20858
LC-P20230315042	ulcer	8.5572
LC-P20230315042	ulcer	6.51772
LC-P20230315042	ulcer	0.499632
LC-P20230315042	ulcer	10.4078
LC-P20230315042	ulcer	31.121
LC-P20230315042	ulcer	13.9527
LC-P20230315042	ulcer	32.8961
LC-P20230315042	ulcer	26.8748
LC-P20230315042	ulcer	1.51073
LC-P20230315042	ulcer	1.88841
LC-P20230315042	ulcer	31.0347
LC-P20230315042	ulcer	27.1176
LC-P20230315042	ulcer	24.1123
LC-P20230315042	ulcer	13.8124
LC-P20230315042	ulcer	20.9128
LC-P20230315042	ulcer	24.7814
LC-P20230315042	ulcer	23.7778
LC-P20230315042	ulcer	21.4578
LC-P20230315042	ulcer	0.490987
LC-P20230315042	ulcer	0.421214
LC-P20230315042	ulcer	24.6896
LC-P20230315042	normal skin	1.56468
LC-P20230315042	normal skin	4.25162
LC-P20230315042	normal skin	30.7973
LC-P20230315042	normal skin	9.83053
LC-P20230315042	normal skin	6.62023
LC-P20230315042	normal skin	6.04292
LC-P20230315042	normal skin	15.3501
LC-P20230315042	normal skin	19.1971
LC-P20230315042	normal skin	21.8948
LC-P20230315042	normal skin	19.1755
LC-P20230315042	normal skin	20.7186
LC-P20230315042	normal skin	27.2201
LC-P20230315042	normal skin	24.7328
LC-P20230315042	normal skin	9.46904
LC-P20230315042	normal skin	30.9754
LC-P20230315042	normal skin	13.3322
LC-P20230315042	normal skin	7.0141
LC-P20230315042	normal skin	29.7452
LC-P20230315042	normal skin	33.4519
LC-P20230315042	normal skin	14.1955
LC-P20230315042	normal skin	0.481913
LC-P20230315042	normal skin	20.9074
LC-P20230315042	normal skin	5.06634
LC-P20230315042	normal skin	6.10766
LC-P20230315042	normal skin	1.17082
LC-P20230315042	normal skin	20.0441
LC-P20230315042	normal skin	2.4981
LC-P20230315042	normal skin	22.8336
